# Supplementary material for: Observation of slow magnetic relaxation in triple-stranded lanthanide helicates
Source: Royal Society of Chemistry journal article supplement (doi:10.1039/c1dt10729a), 2011-01-01
Supplement: c1dt10729a.pdf [file c1dt10729a.pdf]

## Supporting Information

### Observation of Slow Magnetic Relaxation in Triple-stranded Lanthanide Helicates

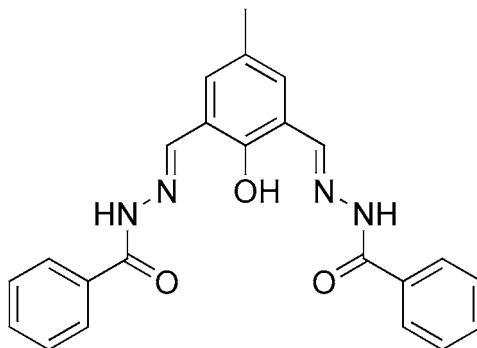

Scheme S1 Structure of the ligand.

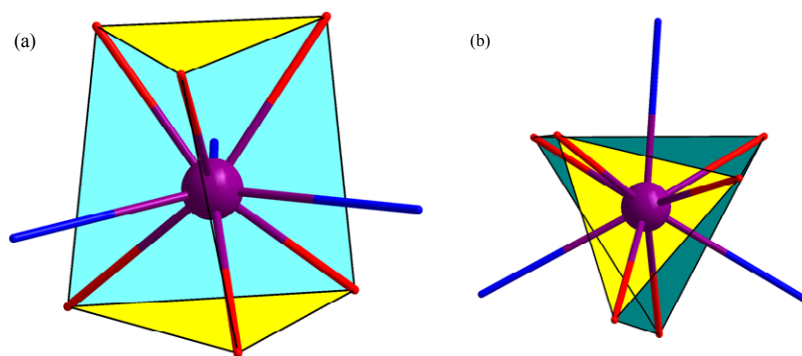

Fig. S1 (a) Side view and (b) top view of the tricapped trigonal-prismatic coordination environment of the  $\text{Dy}^{\text{III}}$  ion in **1**.

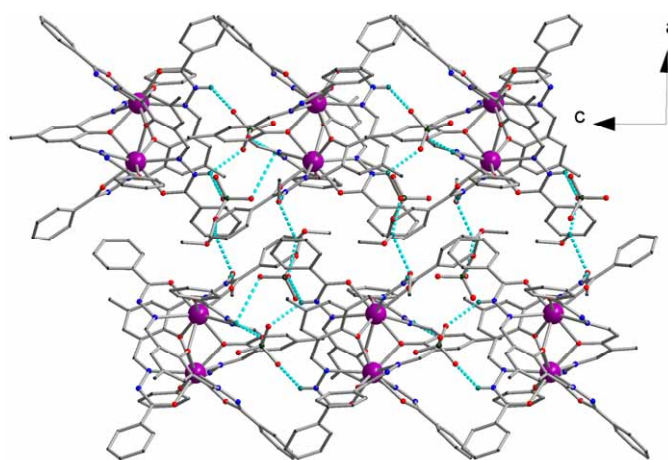

Fig. S2 Illustrations showing the hydrogen bonding interactions (blue lines) and the packing arrangements of complex **1** along the *b* axis, containing alternating  $\Delta$  and  $\Lambda$  configurations.

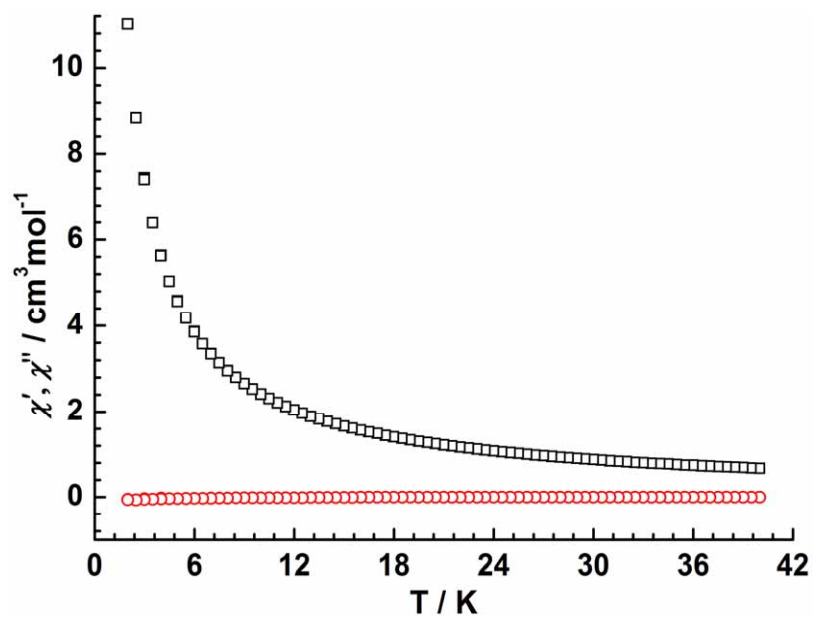

Fig. S3. Temperature dependence of the in-phase (square) and out-of-phase (circle) ac susceptibility for **1** under zero dc field at 1000 Hz.

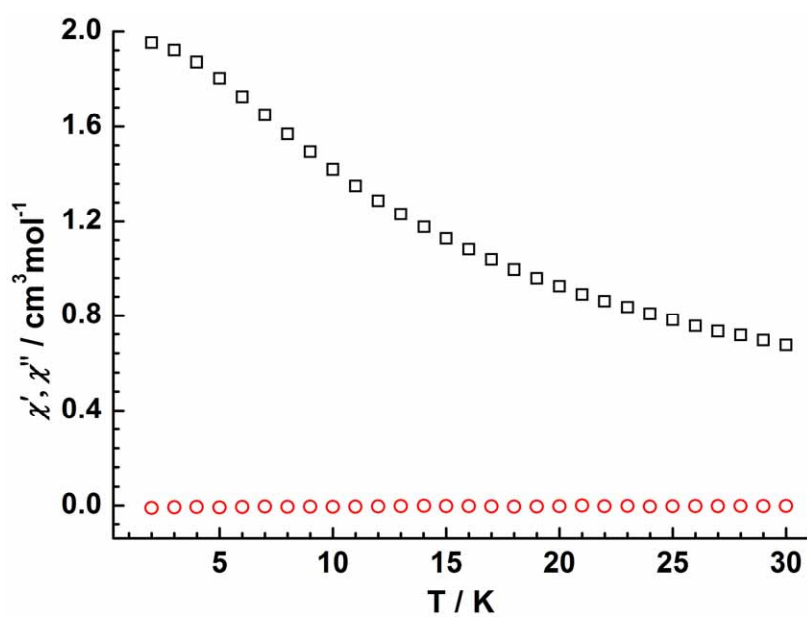

Fig. S4. Temperature dependence of the in-phase (square) and out-of-phase (circle) ac susceptibility for **2** under zero dc field at 1000 Hz.

Table S1. Selected bond lengths (Å) and bond angles (°) of **1**.

|                 |            |                  |            |
|-----------------|------------|------------------|------------|
| Dy(1)-O(7)      | 2.303(3)   | O(3)-Dy(1)-O(9)  | 83.44(11)  |
| Dy(1)-O(1)      | 2.316(3)   | O(7)-Dy(1)-O(6)  | 86.29(10)  |
| Dy(1)-O(4)      | 2.329(3)   | O(1)-Dy(1)-O(6)  | 144.69(10) |
| Dy(1)-O(3)      | 2.331(3)   | O(4)-Dy(1)-O(6)  | 127.17(10) |
| Dy(1)-O(9)      | 2.364(3)   | O(3)-Dy(1)-O(6)  | 87.17(10)  |
| Dy(1)-O(6)      | 2.392(3)   | O(9)-Dy(1)-O(6)  | 85.19(10)  |
| Dy(1)-N(11)     | 2.581(4)   | N(11)-Dy(1)-N(3) | 116.45(11) |
| Dy(1)-N(3)      | 2.584(4)   | N(11)-Dy(1)-N(7) | 121.38(11) |
| Dy(1)-N(7)      | 2.613(3)   | N(3)-Dy(1)-N(7)  | 121.76(11) |
| Dy(2)-O(7)      | 2.326(3)   | O(7)-Dy(2)-O(1)  | 68.58(10)  |
| Dy(2)-O(1)      | 2.327(3)   | O(7)-Dy(2)-O(4)  | 70.66(10)  |
| Dy(2)-O(4)      | 2.338(3)   | O(1)-Dy(2)-O(4)  | 69.08(10)  |
| Dy(2)-O(2)      | 2.352(3)   | O(7)-Dy(2)-O(2)  | 87.96(10)  |
| Dy(2)-O(5)      | 2.353(3)   | O(1)-Dy(2)-O(2)  | 128.06(10) |
| Dy(2)-O(8)      | 2.393(3)   | O(4)-Dy(2)-O(2)  | 145.94(10) |
| Dy(2)-N(1)      | 2.567(4)   | O(7)-Dy(2)-O(5)  | 142.18(10) |
| Dy(2)-N(5)      | 2.601(4)   | O(1)-Dy(2)-O(5)  | 84.44(10)  |
| Dy(2)-N(9)      | 2.614(3)   | O(4)-Dy(2)-O(5)  | 124.60(10) |
| O(7)-Dy(1)-O(1) | 69.16(10)  | O(2)-Dy(2)-O(5)  | 88.57(10)  |
| O(7)-Dy(1)-O(4) | 71.22(10)  | O(7)-Dy(2)-O(8)  | 125.00(9)  |
| O(1)-Dy(1)-O(4) | 69.41(10)  | O(1)-Dy(2)-O(8)  | 146.21(11) |
| O(7)-Dy(1)-O(3) | 146.74(10) | O(4)-Dy(2)-O(8)  | 85.88(10)  |
| O(1)-Dy(1)-O(3) | 127.19(10) | O(2)-Dy(2)-O(8)  | 85.30(11)  |
| O(4)-Dy(1)-O(3) | 87.24(11)  | O(5)-Dy(2)-O(8)  | 92.18(10)  |
| O(7)-Dy(1)-O(9) | 128.33(11) | N(1)-Dy(2)-N(5)  | 122.51(11) |
| O(1)-Dy(1)-O(9) | 90.52(10)  | N(1)-Dy(2)-N(9)  | 117.87(11) |
| O(4)-Dy(1)-O(9) | 145.83(10) | N(5)-Dy(2)-N(9)  | 119.34(11) |

Table S2. Selected bond lengths (Å) and bond angles (°) of **2**.

|                  |           |                  |           |
|------------------|-----------|------------------|-----------|
| Tb(1)-O(4)       | 2.320(2)  | O(7)-Tb(1)-O(5)  | 145.73(8) |
| Tb(1)-O(1)       | 2.333(2)  | O(4)-Tb(1)-O(8)  | 86.04(8)  |
| Tb(1)-O(2)       | 2.344(2)  | O(1)-Tb(1)-O(8)  | 144.62(8) |
| Tb(1)-O(7)       | 2.346(2)  | O(2)-Tb(1)-O(8)  | 87.73(9)  |
| Tb(1)-O(5)       | 2.376(2)  | O(7)-Tb(1)-O(8)  | 126.84(8) |
| Tb(1)-O(8)       | 2.405(2)  | O(5)-Tb(1)-O(8)  | 85.79(8)  |
| Tb(1)-N(5)       | 2.604(3)  | N(5)-Tb(1)-N(3)  | 116.52(9) |
| Tb(1)-N(3)       | 2.613(3)  | N(5)-Tb(1)-N(9)  | 121.17(9) |
| Tb(1)-N(9)       | 2.626(3)  | N(3)-Tb(1)-N(9)  | 121.91(9) |
| Tb(2)-O(4)       | 2.341(2)  | O(4)-Tb(2)-O(1)  | 68.58(8)  |
| Tb(2)-O(1)       | 2.347(2)  | O(4)-Tb(2)-O(7)  | 70.61(8)  |
| Tb(2)-O(7)       | 2.356(2)  | O(1)-Tb(2)-O(7)  | 69.06(8)  |
| Tb(2)-O(9)       | 2.373(2)  | O(4)-Tb(2)-O(9)  | 141.90(8) |
| Tb(2)-O(3)       | 2.377(2)  | O(1)-Tb(2)-O(9)  | 83.70(8)  |
| Tb(2)-O(6)       | 2.409(2)  | O(7)-Tb(2)-O(9)  | 123.93(8) |
| Tb(2)-N(1)       | 2.585(3)  | O(4)-Tb(2)-O(3)  | 87.62(8)  |
| Tb(2)-N(11)      | 2.616(3)  | O(1)-Tb(2)-O(3)  | 127.65(8) |
| Tb(2)-N(7)       | 2.633(3)  | O(7)-Tb(2)-O(3)  | 145.91(8) |
| O(4)-Tb(1)-O(1)  | 69.16(8)  | O(9)-Tb(2)-O(3)  | 89.43(8)  |
| O(4)-Tb(1)-O(2)  | 146.65(8) | O(4)-Tb(2)-O(6)  | 124.59(8) |
| O(1)-Tb(1)-O(2)  | 126.78(8) | O(1)-Tb(2)-O(6)  | 146.42(8) |
| O(4)-Tb(1)-O(7)  | 71.13(8)  | O(7)-Tb(2)-O(6)  | 85.83(8)  |
| O(1)-Tb(1)-O(7)  | 69.45(8)  | O(9)-Tb(2)-O(6)  | 92.98(8)  |
| O(2)-Tb(1)-O(7)  | 86.89(8)  | O(3)-Tb(2)-O(6)  | 85.57(8)  |
| O(4)-Tb(1)-O(5)  | 127.99(8) | N(1)-Tb(2)-N(11) | 122.56(9) |
| O(1)-Tb(1)-O(5)  | 90.02(8)  | O(2)-Tb(1)-O(5)  | 84.05(9)  |
| N(11)-Tb(2)-N(7) | 119.14(9) | N(1)-Tb(2)-N(7)  | 118.02(9) |
